# Supplementary material
Source: Springer Nature journal article supplement (https://www.springermedizin.de/resource/supplementary/12884_2013_1030_MOESM2_ESM.pdf/9458762)
Supplement: MOESM2 [file 9458762]

Records identified through  
database searching,  
after duplicates removed  
(n = 3344)

Additional records identified  
through other sources  
(n = 3)

**Records screened**  
(n = 3347)

**Records excluded**  
(n = 3283)

**Full-text articles assessed  
for eligibility:**  
(n = 64)  
(n = 21 population-based  
reports) and  
(n = 43 immigrant reports)

**Full-text articles excluded, with  
reasons**  
(n = 1 of population-based  
reports)

- Representativeness  
could not be assessed  
(n = 21 of immigrant reports)
- Focus on childbirth  
beliefs or cultural  
practices, not on views  
of care
- Unable to determine if  
the women were first  
generation immigrants

**Individual studies  
included in qualitative  
synthesis**  
(n = 34):  
**12 population-based  
studies**  
**22 immigrant studies**
